# Supplementary material
Source: HighWire-hosted journal article supplement (https://qdcxjkg.com/highwire/filestream/113597/field_highwire_adjunct_files/1/Supplement_table_2003.pdf)
Supplement: Supplement_table_2003.pdf [file Supplement_table_2003.pdf]

**Supplement not for publishing**

Table S1. Baseline Clinical, Functional, Laboratory, and Hemodynamic Characteristics of the Patients

| Characteristics                            | Atorvastatin<br>(n=112) | Placebo<br>(n=108) | <i>P</i> |
|--------------------------------------------|-------------------------|--------------------|----------|
| Age, ys                                    | 35±13                   | 37±13              | 0.20     |
| Gender, n (%)                              |                         |                    |          |
| Female                                     | 79 (71)                 | 65 (60)            | 0.11     |
| Male                                       | 33 (29)                 | 43(40)             |          |
| Weight, kg                                 | 54±12                   | 57±11              | 0.17     |
| Systolic blood pressure, mmHg              | 112±15                  | 113±15             | 0.66     |
| Diastolic blood pressure, mmHg             | 75±12                   | 73±12              | 0.32     |
| Heart rates, beats/minute                  | 80±11.8                 | 81±10.6            | 0.60     |
| <b>Cause of pulmonary hypertension (%)</b> |                         |                    |          |
| Idiopathic                                 | 30 (27)                 | 34 (32)            | 0.44     |
| Congenital heart disease                   | 59 (53)                 | 38 (35)            | 0.01     |
| Atrialseptal defect                        | 18                      | 5                  |          |
| Ventricular septal defect                  | 22                      | 22                 |          |
| Patent ductusarteriosus                    | 12                      | 5                  |          |
| other                                      | 7                       | 6                  |          |
| Connective-tissue disease                  | 8 (7)                   | 13 (12)            | 0.22     |
| CTEPH                                      | 15 (13)                 | 23 (21)            | 0.12     |

|                                                            |          |          |      |
|------------------------------------------------------------|----------|----------|------|
| <b>WHO functional class, n (%)</b>                         |          |          |      |
| II                                                         | 70 (63)  | 71 (66)  | 0.62 |
| III                                                        | 42 (37)  | 37 (34)  |      |
| Six-minute walk distance, m                                | 355±74   | 346±84   | 0.45 |
| Borg dyspnea index                                         | 3 (2, 4) | 3 (2, 4) | 0.27 |
| Mixed venous oxygen saturation, %                          | 65±8     | 66±8     | 0.22 |
| Total cholesterol, mmol/L                                  | 4.0±0.9  | 4.2±1.0  | 0.29 |
| Low-density lipoprotein, mmol/L                            | 2.3±0.7  | 2.3±0.8  | 0.77 |
| <b>Hemodynamic parameters</b>                              |          |          |      |
| Right atrial pressure, mmHg                                | 9±6      | 10±6     | 0.21 |
| Mean pulmonary arterial pressure, mmHg                     | 69±19    | 66±20    | 0.32 |
| Pulmonary capillary wedge pressure,<br>mmHg                | 9±4      | 10±4     | 0.75 |
| Cardiac output, L/min                                      | 3.8±1.4  | 4.1±1.7  | 0.11 |
| Cardiac indexes, L/min/m <sup>2</sup>                      | 2.4±0.8  | 2.6±1    | 0.19 |
| Pulmonary vascular resistance,<br>dyn·sec·cm <sup>-5</sup> | 1633±745 | 1456±699 | 0.07 |
| <b>Concomitant medication, n (%)</b>                       |          |          |      |
| Digoxin                                                    | 67 (60)  | 58 (54)  | 0.36 |
| Diuretics                                                  | 87 (78)  | 84 (78)  | 0.99 |
| Warfarin                                                   | 64 (57)  | 60 (56)  | 0.81 |

Values are mean±SD, median (Q1, Q3) or n (%) when appropriate.
